# Supplementary material for: Integrating patient- and caregiver-reported outcome measures into the daily care routines of specialised outpatient palliative care: a qualitative study (ELSAH) on feasibility, acceptability and appropriateness
Source: Springer Nature journal article supplement (doi:10.1186/s12904-022-00944-1), 2022-05-02
Supplement: MOESM1 [file 12904_2022_944_MOESM1_ESM.pdf]

## Additional file 1

**Article:** Integrating patient- and caregiver-reported outcome measures into the daily care routines of specialised outpatient palliative care: A qualitative study (ELSAH) on feasibility and practicality

**Authors:** Hannah Seipp, Jörg Haasenritter, Michaela Hach, Dorothée Becker, Lisa-R. Ulrich, Dania Schütze, Jennifer Engler, Cornelia Plöger, Stefan Bösner, Katrin Kuss

### A. Focus group topic guide (translated into English)

- Please describe your experiences with the measures in general terms (applicability, comprehensibility, scope, content).
- What do you currently think about
  - ... applicability?
  - ... comprehensibility?
  - ... scope?
  - ... content?
- How do you incorporate the outcome measures into your daily work?
- Where do you see any room for improvement?
- What feedback have you received from users of the outcome measures?
  - Health professionals' views
  - Patients' views
  - Relatives' views
- Have you received any feedback on individual elements of the outcome measures?
- Do you have any suggestions/wishes concerning their further use ?

### B. COREQ (COnsolidated criteria for REporting Qualitative research) Checklist

| Item No.                                | Guide question/description                             | Answer (Reported in Section)                                                                                                                  |
|-----------------------------------------|--------------------------------------------------------|-----------------------------------------------------------------------------------------------------------------------------------------------|
| Domain 1: Research team and reflexivity |                                                        |                                                                                                                                               |
| Personal Characteristics                |                                                        |                                                                                                                                               |
| 1. Interviewer/facilitator              | Which author/s conducted the interview or focus group? | HS, KK, and JH conducted the focus groups, meetings, and answered telephone calls and e-mails (Design)                                        |
| 2. Credentials                          | What were the researcher's credentials? E.g. PhD, MD   | Master's degree, PhD, professor or manager of the Professional Association of Specialised Palliative Homecare in Hesse (Authors' information) |
| 3. Occupation                           | What was their occupation at the time of the study?    | Researchers at the universities of Marburg and Frankfurt, management of                                                                       |

|                                             |                                                                                                                                           |                                                                                                                                                                                  |
|---------------------------------------------|-------------------------------------------------------------------------------------------------------------------------------------------|----------------------------------------------------------------------------------------------------------------------------------------------------------------------------------|
|                                             |                                                                                                                                           | the Professional Association of Specialised Palliative Homecare in Hesse (Authors' information)                                                                                  |
| 4. Gender                                   | Was the researcher male or female?                                                                                                        | HS, MH, DB, DS, JE, CP, KK are female, and JH, SB male                                                                                                                           |
| 5. Experience and training                  | What experience or training did the researcher have?                                                                                      | Designing and conducting previous research in general practice and palliative care                                                                                               |
| Relationship with participants              |                                                                                                                                           |                                                                                                                                                                                  |
| 6. Relationship established                 | Was a relationship established prior to study commencement?                                                                               | Yes, a relationship was established in a previous phase of the study (sampling)                                                                                                  |
| 7. Participant knowledge of the interviewer | What did the participants know about the researcher? e.g. personal goals, reasons for doing the research                                  | The participants knew the researchers' occupations and the overall aim of the study                                                                                              |
| 8. Interviewer characteristics              | What characteristics were reported about the interviewer/facilitator? e.g. Bias, assumptions, reasons and interests in the research topic | The Professional Association of Specialised Palliative Homecare in Hesse represents all SOPC teams in Hesse and was a research partner in this study (strengths and limitations) |
| <b>Domain 2: study design</b>               |                                                                                                                                           |                                                                                                                                                                                  |
| Theoretical framework                       |                                                                                                                                           |                                                                                                                                                                                  |
| 9. Methodological orientation and Theory    | What methodological orientation was stated to underpin the study?                                                                         | We used a multi-method qualitative design and qualitative content analysis (aim, analysis)                                                                                       |
| Participant selection                       |                                                                                                                                           |                                                                                                                                                                                  |
| 10. Sampling                                | How were participants selected? e.g. purposive, convenience, consecutive, snowball                                                        | SOPC teams were purposively sampled (sampling)                                                                                                                                   |
| 11. Method of approach                      | How were participants approached? e.g. face-to-face, telephone, mail, email                                                               | We approached SOPC-team leaders face-to-face and per email.                                                                                                                      |
| 12. Sample size                             | How many participants were in the study?                                                                                                  | Five SOPC teams participated in the pilot run and 14 team members in the focus groups (sample)                                                                                   |
| 13. Non-participation                       | How many people refused to participate or dropped out? Reasons?                                                                           | All invited SOPC teams participated (sample)                                                                                                                                     |
| Setting                                     |                                                                                                                                           |                                                                                                                                                                                  |
| 14. Setting of data collection              | Where was the data collected? e.g. home, clinic, workplace                                                                                | The multi-method qualitative design meant data was collected in various ways (design)                                                                                            |
| 15. Presence of non-participants            | Was anyone else present besides the participants and researchers?                                                                         | No one else took part in the focus groups                                                                                                                                        |

|                                    |                                                                                                                                   |                                                                                                                               |
|------------------------------------|-----------------------------------------------------------------------------------------------------------------------------------|-------------------------------------------------------------------------------------------------------------------------------|
| 16. Description of sample          | What are the important characteristics of the sample? e.g. demographic data, date                                                 | The important characteristics are presented in the main text (sample)                                                         |
| Data collection                    |                                                                                                                                   |                                                                                                                               |
| 17. Interview guide                | Were questions, prompts, guides provided by the authors? Was it pilot tested?                                                     | The focus group topic guide is provided as supplemental material                                                              |
| 18. Repeat interviews              | Were repeat interviews carried out? If yes, how many?                                                                             | Not applicable                                                                                                                |
| 19. Audio/visual recording         | Did the research use audio or visual recording to collect the data?                                                               | We audio recorded the focus group (design)                                                                                    |
| 20. Field notes                    | Were field notes made during and/or after the interview or focus group?                                                           | We collected field notes during focus groups, meetings and conversations (design)                                             |
| 21. Duration                       | What was the duration of the interviews or focus group?                                                                           | Information is provided on how long they lasted (sample)                                                                      |
| 22. Data saturation                | Was data saturation discussed?                                                                                                    | Repeated requests and numerous opportunities enabled the views of all participants to be included (strengths and limitations) |
| 23. Transcripts returned           | Were transcripts returned to participants for comment and/or correction?                                                          | No                                                                                                                            |
| Domain 3: analysis and findings    |                                                                                                                                   |                                                                                                                               |
| Data analysis                      |                                                                                                                                   |                                                                                                                               |
| 24. Number of data coders          | How many data coders coded the data?                                                                                              | HS coded the data (analysis)                                                                                                  |
| 25. Description of the coding tree | Did authors provide a description of the coding tree?                                                                             | No                                                                                                                            |
| 26. Derivation of themes           | Were themes identified in advance or derived from the data?                                                                       | We took into account the themes identified during data collection and added some emerging topics (analysis)                   |
| 27. Software                       | What software, if applicable, was used to manage the data?                                                                        | We use MAXQDA (analysis)                                                                                                      |
| 28. Participant checking Reporting | Did participants provide feedback on the findings?                                                                                | Participants received feedback through the iterative process of feedback and adaptation (design)                              |
| Reporting                          |                                                                                                                                   |                                                                                                                               |
| 29. Quotations presented           | Were participant quotations presented to illustrate the themes / findings? Was each quotation identified? e.g. participant number | Yes (results)                                                                                                                 |
| 30. Data and findings consistent   | Was there consistency between the data presented and the findings?                                                                | Yes (results)                                                                                                                 |

|                             |                                                                        |               |
|-----------------------------|------------------------------------------------------------------------|---------------|
| 31. Clarity of major themes | Were major themes clearly presented in the findings?                   | Yes (results) |
| 32. Clarity of minor themes | Is there a description of diverse cases or discussion of minor themes? | Yes (results) |

Based on: Tong A, Sainsbury P, Craig J. Consolidated criteria for reporting qualitative research (COREQ): A 32-item checklist for interviews and focus groups. *International Journal for Quality in Health Care*. 2007;19:349–57. doi:10.1093/intqhc/mzm042.
